# Supplementary material for: New Insights into Lymphocystis Disease Virus Genome Diversity
Source: MDPI journal article supplement (doi:10.3390/v14122741), 2022-12-08
Supplement: s1 [file s1]

## Supplementary Information

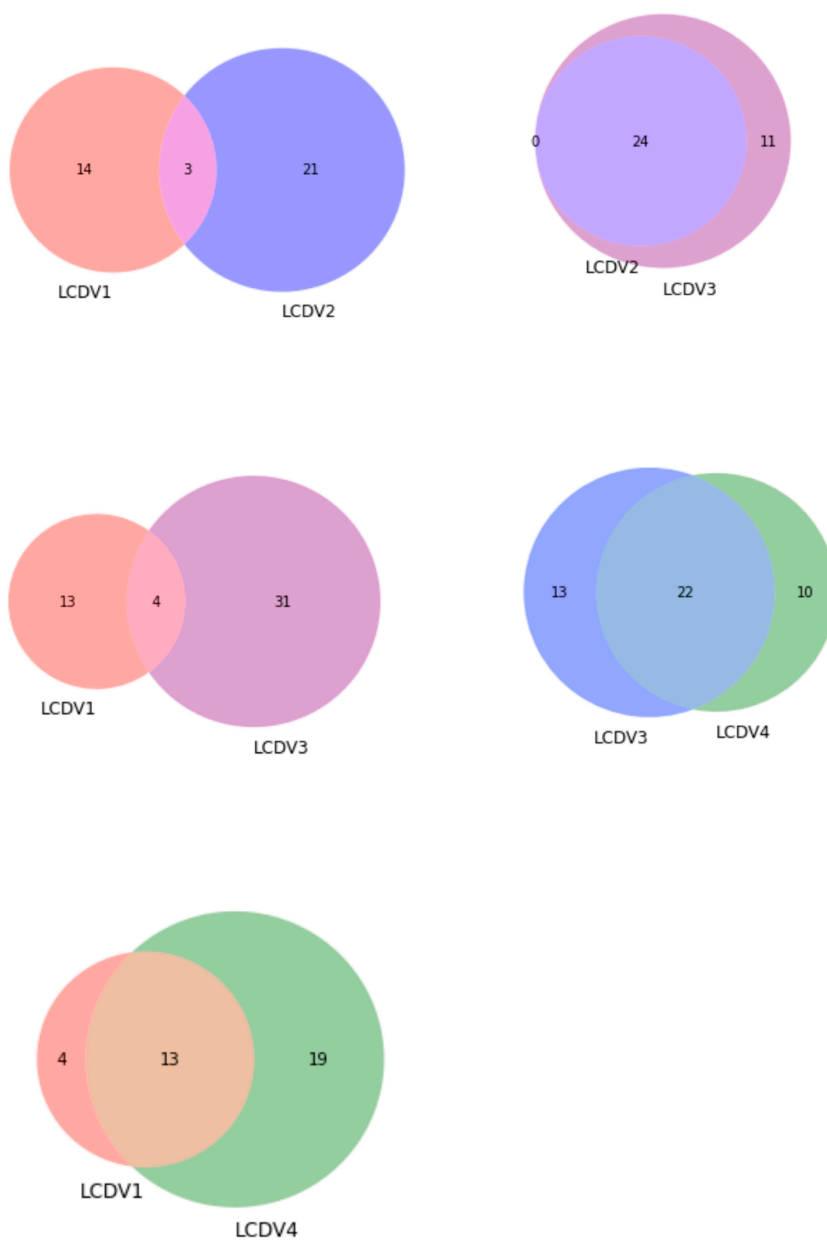

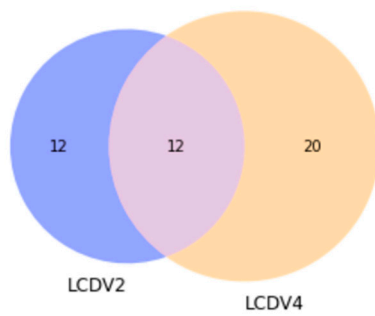**Figure S1**

Venn diagram of shared coding sequences of LCDV 1-4. Venn diagrams were plotted using the matplotlib-venn 0.11.7 python library. LCDV1-4 ORFs were screened from overall 111, 239,366, 148 ORfs enoded by the respective LCDV1-4 genomes.

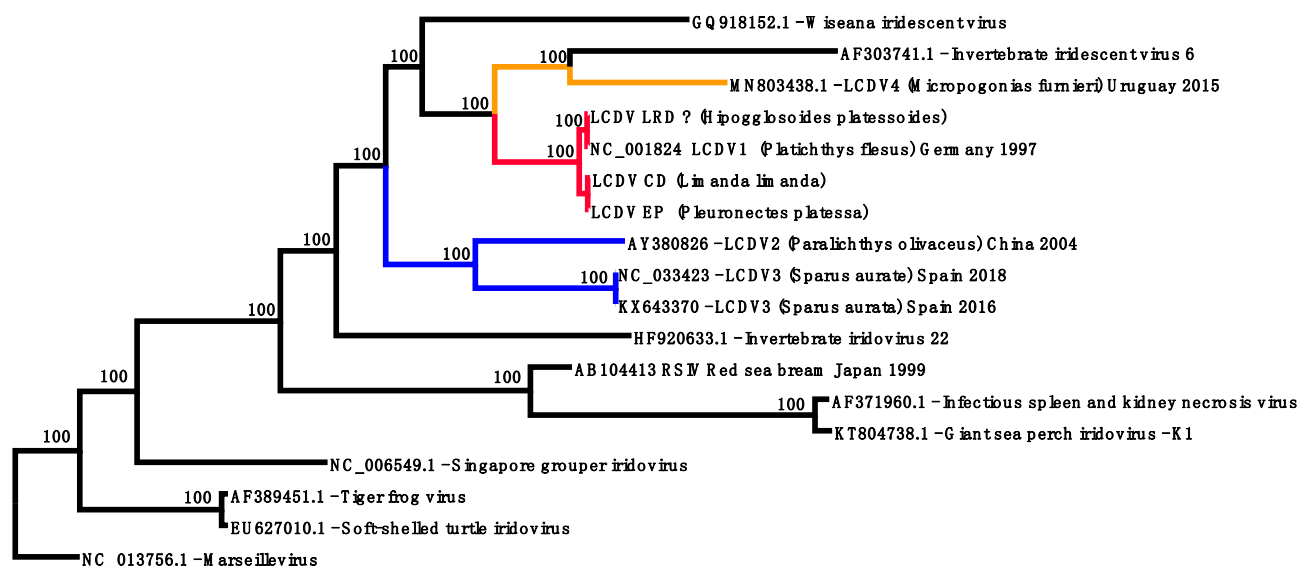

**Figure S2:** RaXML tree of Figure 3A presented with bootstrap values given in 100%.
